# Supplementary material for: Early Long-Term Memory Impairment and Changes in the Expression of Synaptic Plasticity-Associated Genes, in the McGill-R-Thy1-APP Rat Model of Alzheimer's-Like Brain Amyloidosis
Source: PubMed Central journal article supplement (PMC7862771; doi:10.3389/fnagi.2020.585873), 2021-01-22
Supplement: Image_2.pdf [file Image_2.pdf]

# Supplementary Figure 2 (S2)

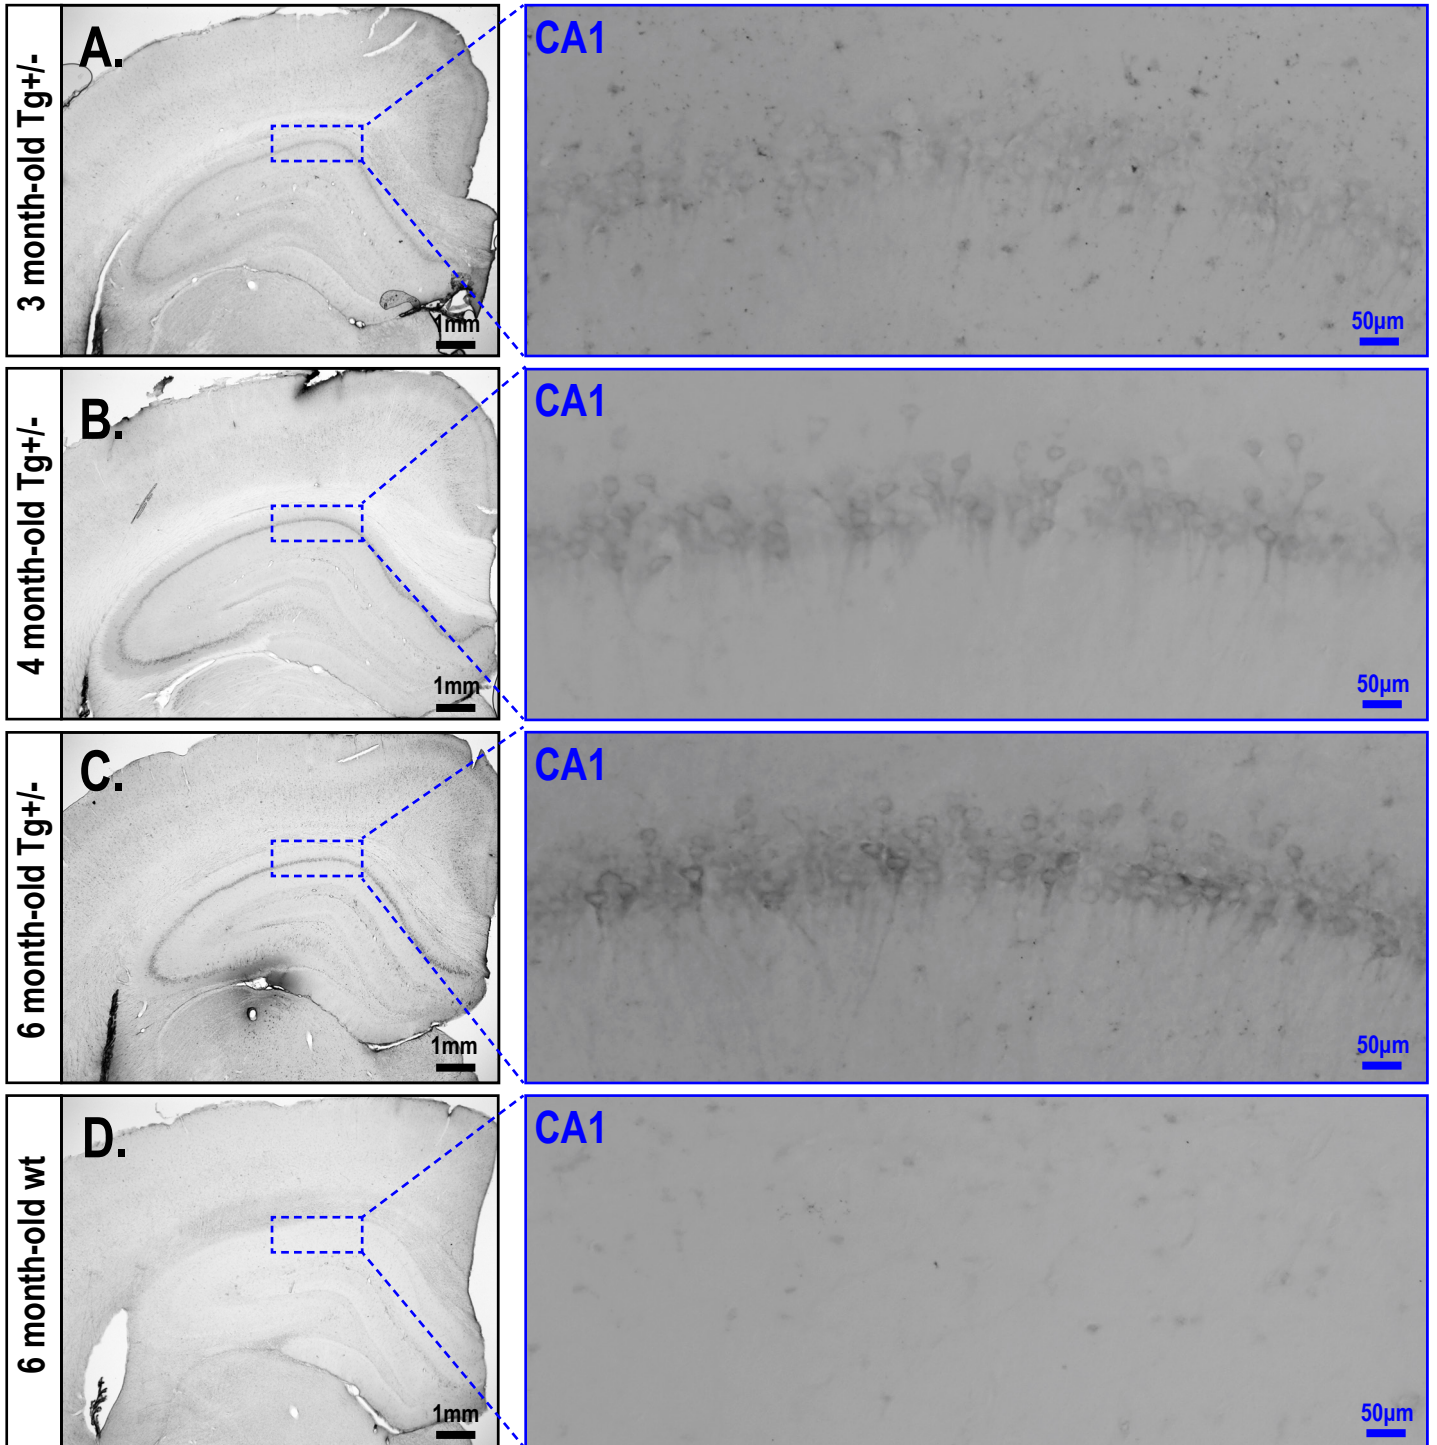

**E.**

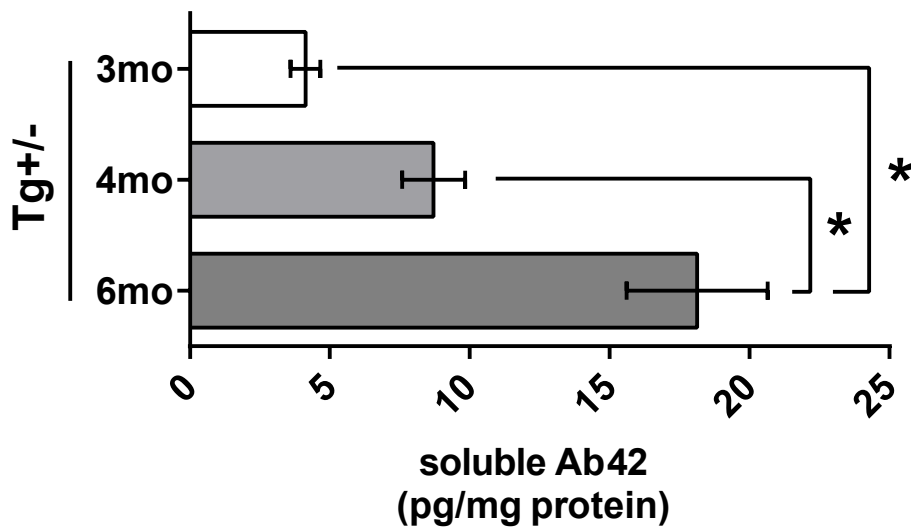

**Supplementary Figure 2 (S2). Pre-plaque amyloid pathology in McGill-R-Thy1-APP Tg+/- rats. A-D)** Representative pictures of human A $\beta$  immunoreactivity detected using the monoclonal antibody McSA1 at 3 (**A**), 4 (**B**) and 6 (**C**) months of age. At early stages of amyloid pathology, intraneuronal A $\beta$  accumulates in the cerebral cortex and hippocampus (scale bar 1mm). As expected, wild-type rats (**D**) are devoid of McSA1 immunoreactivity. Magnified views of CA1 regions are included as insets at the right side of each brain slice picture, clearly showing intraneuronal A $\beta$  accumulation (scale bar 50 $\mu$ m). **E)** Abundance of TBS-soluble human A $\beta$ 42 peptides in the hippocampus was determined by ELISA (NTg+/-=4-5 rats per age). Data are expressed as mean  $\pm$  SEM. \*p < 0.05, analyzed with a two-tailed, unpaired t test.
