# Supplementary material for: Early Long-Term Memory Impairment and Changes in the Expression of Synaptic Plasticity-Associated Genes, in the McGill-R-Thy1-APP Rat Model of Alzheimer's-Like Brain Amyloidosis
Source: PubMed Central journal article supplement (PMC7862771; doi:10.3389/fnagi.2020.585873), 2021-01-22
Supplement: Image_4.pdf [file Image_4.pdf]

# Supplementary Figure 4 (S4)

A.

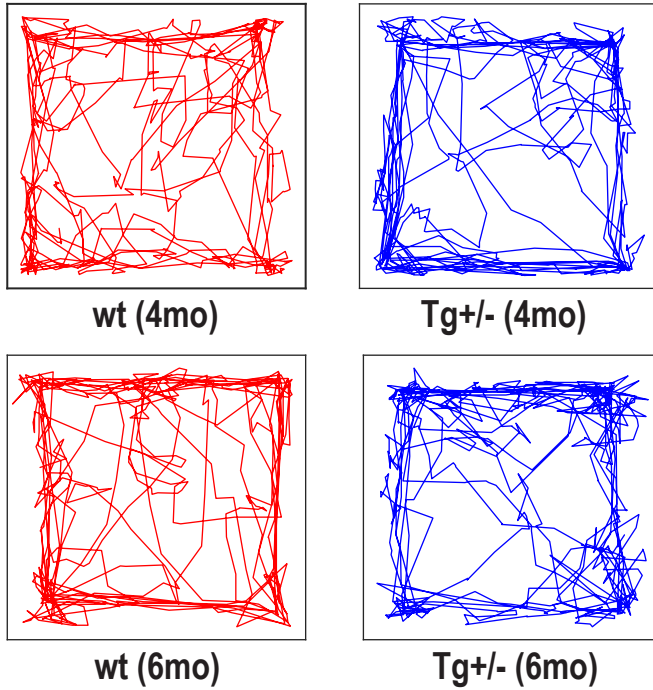

B.

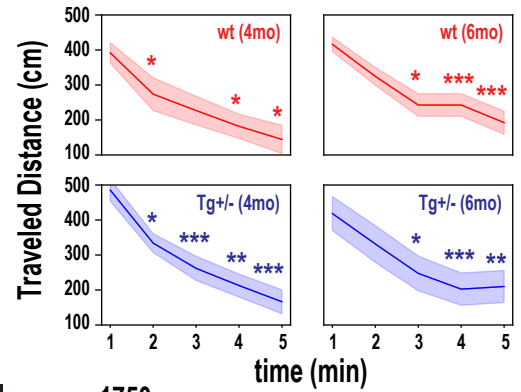

C.

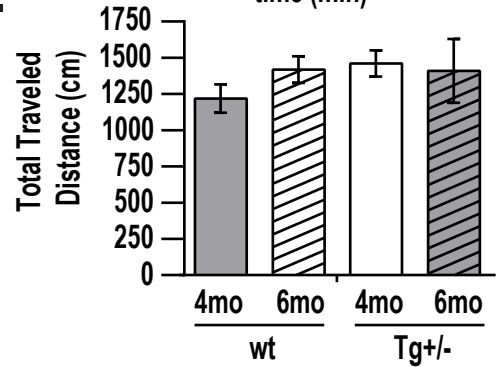

D.

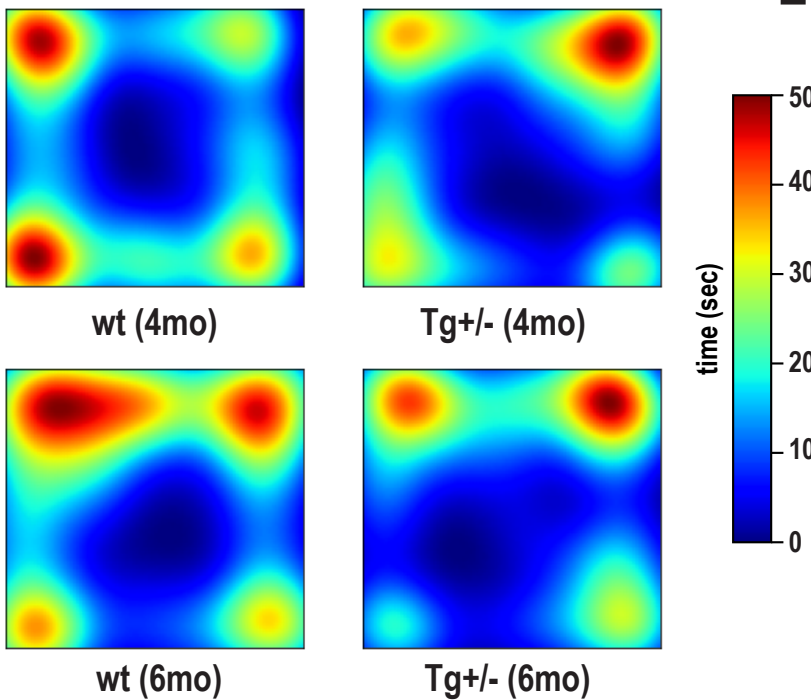

E.

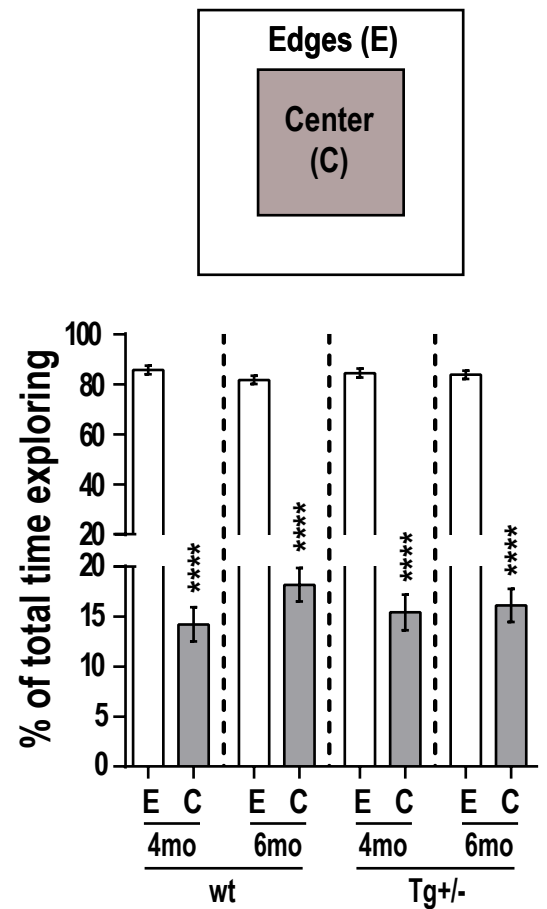

F.

|       |      | Resting Time (sec) | # Groomings |
|-------|------|--------------------|-------------|
| wt    | 4 mo | 11,88 ± 3,56       | 1,75 ± 0,49 |
|       | 6 mo | 11,50 ± 4,03       | 1,83 ± 0,47 |
| Tg+/- | 4 mo | 18,75 ± 6,67       | 2,50 ± 0,56 |
|       | 6 mo | 22,38 ± 4,20       | 2,25 ± 0,52 |

**Supplementary Figure 4 (S4). Quantitative analysis of trajectory, traveled distance and resting time in the OF:**

**A) Overall trajectory in the experimental arena.** Path traveled by McGill-R-Thy1-APP Tg<sup>+/-</sup> male rats (blue line) and their wt littermates (red line) during the 5 minutes training session (Tr). Representative trajectories for 4- and 6-month-old wt and Tg<sup>+/-</sup> rats.

**B) Traveled distance based on time segment.** Average distance traveled by Tg<sup>+/-</sup> male rats (blue line) and their wt littermates (red line) was calculated in one-minute bins. Numbers represent mean traveled distance  $\pm$  SEM. Statistically significant differences - indicating short term habituation (ST) to the OF- were assessed by One-way ANOVA, Dunnett post-hoc test (\*,  $P < 0.05$ , \*\*  $P < 0.01$ , \*\*\*  $P < 0.001$ ).

**C) Total distance traveled.** Bar diagram represents mean distance traveled  $\pm$  SEM in the total 5 minutes time-frame. No statistically significant differences were observed for any selected pair of genotype and age (One-way ANOVA, Dunnett post-hoc test).

**D) Heat-map plot indicating time spent in the different locations.** For the raw scatter plot of the rat position (one xy-coordinate per time-point), the plotting window was cut in several bins, and the number of data points in each bin is represented by a different color. The resulting 2D histogram was subjected to a Gaussian KDE (kernel density estimate) processing to generate the final smoothed 2D density plot. Red = more time, blue = less time. Representative heat-maps for 4- and 6-month-old. wt and Tg<sup>+/-</sup> rats.

**E) Bidimensional exploratory behavior by zone.** Two regions-of-interest (ROIs), the outer edge (E, white) and the center (C, gray) of the arena were delimited. Number of time-points within each ROI were counted and expressed as a percentage of the 5 minutes time-frame total time-points. Bars represent mean exploration time  $\pm$  SEM. Time spent in (C) was significantly lower compared with time in (E) for any selected genotype and age (\*\*\*\*  $P < 0.0001$ , One-way ANOVA, Tukey's multiple comparisons test). No statistically significant differences were observed between time spent in (E) among the different groups, and (C) values were also similar between groups (One-way ANOVA, Tukey's multiple comparisons test).

**F) Resting time and stereotyped behavior.** The amount of time the rats remained motionless as well as the repetitive movement (number of *grooming stereotypies*) were assessed. Numbers represent mean values  $\pm$  SEM. No statistically significant differences in these parameters were observed for any selected pair of genotype and age (One-way ANOVA, Dunnett post-hoc test).
