# Supplementary material for: Early Long-Term Memory Impairment and Changes in the Expression of Synaptic Plasticity-Associated Genes, in the McGill-R-Thy1-APP Rat Model of Alzheimer's-Like Brain Amyloidosis
Source: PubMed Central journal article supplement (PMC7862771; doi:10.3389/fnagi.2020.585873), 2021-01-22
Supplement: Image_5.pdf [file Image_5.pdf]

# Supplementary Figure 5 (S5)

A.

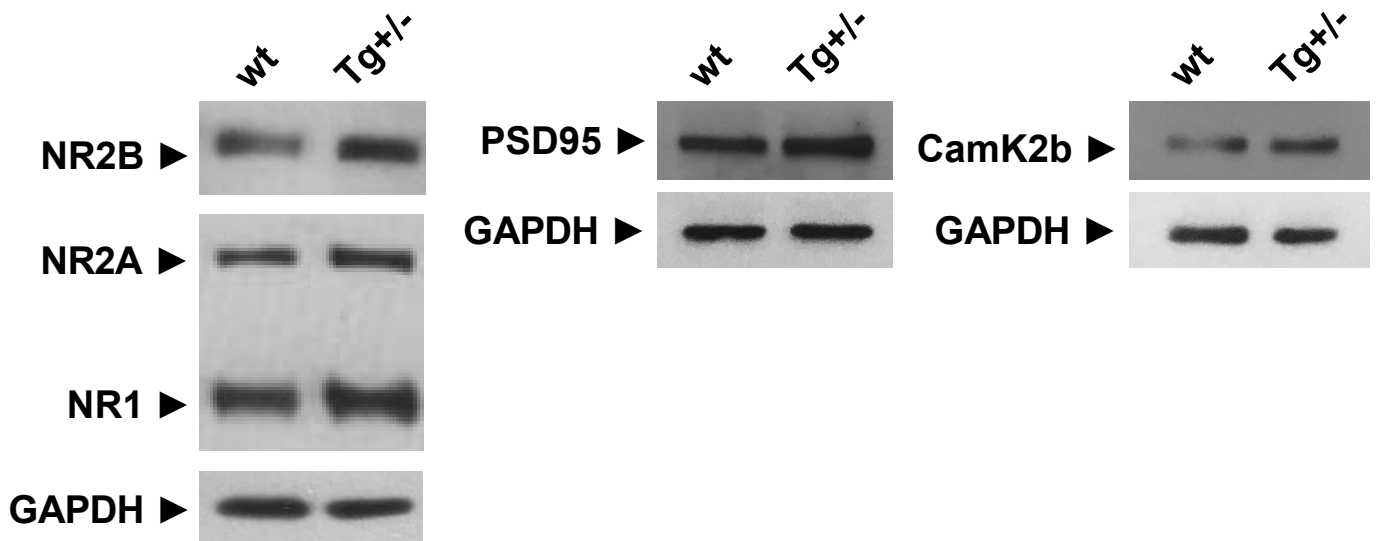

B.

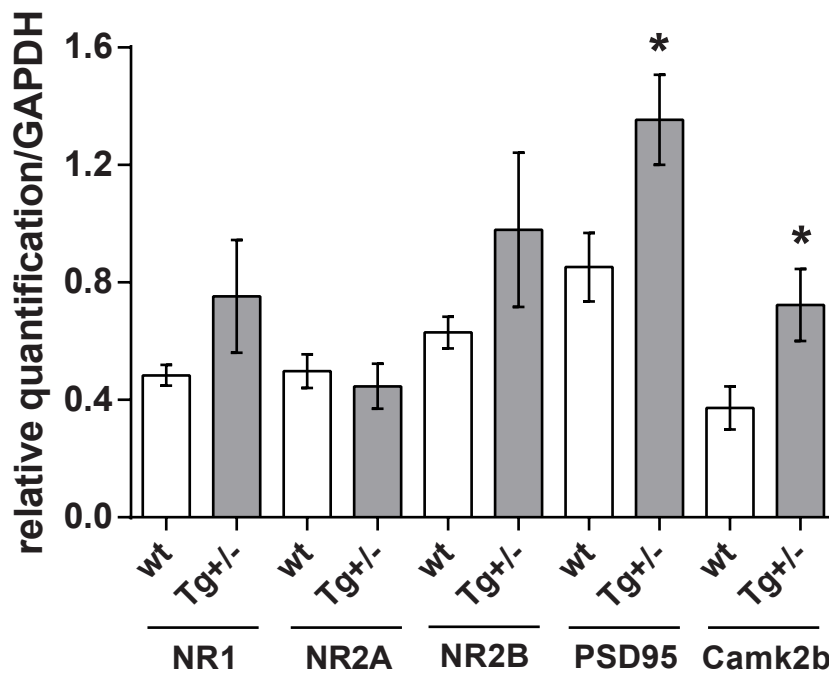

**Supplementary Figure 5 (S5). Basal expression levels of NMDAr subunits and synaptic proteins in McGill-R-Thy1-APP Tg+/- and wt rats. A)** Western blotting was performed on hippocampal lysates from 4-month-old Tg+/- (NTg+/-=5) and wt rats (Nwt=4-5) and probed for NR1, NR2A, NR2B, PSD-95 and CAMK2 $\beta$  protein levels as well as GAPDH as loading control. **B)** Quantification of the protein levels by densitometry. Values are mean  $\pm$  SEM. \*p < 0.05, analyzed with a two-tailed, unpaired t test.
